# Supplementary material
Source: PubMed Central journal article supplement (PMC9840715)
Supplement: NIHMS1812634-supplement-Supplemental_Table_S1.pdf [file NIHMS1812634-supplement-Supplemental_Table_S1.pdf]

**Supplemental Table S1: Complete list of 394 operations included in the analysis, by operation type <sup>a</sup>**

| Case Number                  | Operations                                                                                                                                                                                                                                                                                | Elective Operation (yes/no) |
|------------------------------|-------------------------------------------------------------------------------------------------------------------------------------------------------------------------------------------------------------------------------------------------------------------------------------------|-----------------------------|
| <b>Neurologic (n=20)</b>     |                                                                                                                                                                                                                                                                                           |                             |
| 1                            | Other excision or destruction of lesion or tissue of brain                                                                                                                                                                                                                                | no                          |
| 2                            | Release Lumbar Nerve, Open Approach; Other peripheral nerve or ganglion decompression or lysis of adhesions                                                                                                                                                                               | yes                         |
| 3                            | Trans-sphenoidal resection of pituitary tumor; Right frontal craniotomy for pituitary tumor                                                                                                                                                                                               | yes                         |
| 4                            | Other exploration and decompression of spinal canal                                                                                                                                                                                                                                       | yes                         |
| 5                            | Incision of cerebral meninges                                                                                                                                                                                                                                                             | no                          |
| 6                            | Dorsal and dorsolumbar fusion of the anterior column, anterior technique; Lumbar and lumbosacral fusion of the anterior column, posterior technique; Excision of intervertebral disc; Other partial ostectomy, other bones; Other repair and plastic operations on spinal cord structures | yes                         |
| 7                            | Lumbar and lumbosacral fusion of the anterior column, posterior technique                                                                                                                                                                                                                 | yes                         |
| 8                            | Bilateral bur holes for drainage of subdural hematoma; Other craniotomy                                                                                                                                                                                                                   | no                          |
| 9                            | Excision of intervertebral disc                                                                                                                                                                                                                                                           | yes                         |
| 10                           | Lumbar and lumbosacral fusion of the anterior column, anterior technique; Excision of bone for graft, other bones; Other exploration and decompression of spinal canal                                                                                                                    | no                          |
| 11                           | Other exploration and decompression of spinal canal                                                                                                                                                                                                                                       | yes                         |
| 12                           | Other excision or destruction of lesion or tissue of brain                                                                                                                                                                                                                                | no                          |
| 13                           | Lumbar and lumbosacral fusion of the posterior column, posterior technique; Excision of lesion of other soft tissue; Excision of bone for graft, other bones; Other exploration and decompression of spinal canal; Fusion or refusion of 2-3 vertebrae                                    | yes                         |
| 14                           | Excision or destruction of lesion of spinal cord or spinal meninges; Other exploration and decompression of spinal canal                                                                                                                                                                  | yes                         |
| 15                           | Other exploration and decompression of spinal canal                                                                                                                                                                                                                                       | yes                         |
| 16                           | Lumbar and lumbosacral fusion of the anterior column, anterior technique                                                                                                                                                                                                                  | yes                         |
| 17                           | Lumbar and lumbosacral fusion of the anterior column, posterior technique                                                                                                                                                                                                                 | yes                         |
| 18                           | Lumbar and lumbosacral fusion of the anterior column, posterior technique                                                                                                                                                                                                                 | yes                         |
| 19                           | Other exploration and decompression of spinal canal                                                                                                                                                                                                                                       | yes                         |
| 20                           | Other exploration and decompression of spinal canal                                                                                                                                                                                                                                       | yes                         |
| <b>Cardiothoracic (n=29)</b> |                                                                                                                                                                                                                                                                                           |                             |
| 21                           | Lobectomy of Lung; Repair of pleura; Other partial ostectomy, other bones; Partial nephrectomy                                                                                                                                                                                            | yes                         |
| 22                           | (Aorto)coronary bypass of three coronary arteries; Single internal mammary-coronary artery bypass                                                                                                                                                                                         | yes                         |
| 23                           | Complete Pneumonectomy; Simple excision of other lymphatic structure                                                                                                                                                                                                                      | yes                         |
| 24                           | (Aorto)coronary bypass of three coronary arteries; bur holes for evacuation of subdural                                                                                                                                                                                                   | no                          |
| 25                           | (Aorto)coronary bypass of three coronary arteries                                                                                                                                                                                                                                         | yes                         |
| 26                           | (Aorto)coronary bypass of three coronary arteries; Single internal mammary-coronary artery bypass                                                                                                                                                                                         | no                          |
| 27                           | Open and other replacement of aortic valve with tissue graft; (Aorto)coronary bypass of one coronary artery                                                                                                                                                                               | yes                         |
| 28                           | Open and other replacement of aortic valve; Reopening of recent thoracotomy site                                                                                                                                                                                                          | yes                         |
| 29                           | (Aorto)coronary bypass of four coronary arteries                                                                                                                                                                                                                                          | yes                         |
| 30                           | (Aorto)coronary bypass of three coronary arteries; placement intra-aortic balloon pump                                                                                                                                                                                                    | no                          |

|    |                                                                                                                                         |     |
|----|-----------------------------------------------------------------------------------------------------------------------------------------|-----|
| 31 | Open and other replacement of aortic valve with tissue graft; Incision of vessel, lower limb arteries                                   | yes |
| 32 | Open and other replacement of aortic valve with tissue graft; Excision or destruction of other lesion or tissue of heart, open approach | no  |
| 33 | Other local excision or destruction of lesion or tissue of lung                                                                         | yes |
| 34 | (Aorto)coronary bypass of two coronary arteries; Single internal mammary-coronary artery bypass                                         | no  |
| 35 | Lobectomy of Lung; Regional lymph node excision                                                                                         | yes |
| 36 | Open and other replacement of aortic valve                                                                                              | yes |
| 37 | Lobectomy of Lung; Radical excision of other lymph nodes                                                                                | yes |
| 38 | Lobectomy of Lung; Thoracotomy                                                                                                          | yes |
| 39 | Endovascular replacement of aortic valve                                                                                                | yes |
| 40 | (Aorto)coronary bypass of two coronary arteries; Single internal mammary-coronary artery bypass                                         | no  |
| 41 | Lobectomy of Lung; Thoracotomy                                                                                                          | yes |
| 42 | Open and other replacement of aortic valve                                                                                              | yes |
| 43 | (Aorto)coronary bypass of three coronary arteries                                                                                       | no  |
| 44 | (Aorto)coronary bypass of four coronary arteries                                                                                        | yes |
| 45 | (Aorto)coronary bypass of four coronary arteries; Single internal mammary-coronary artery bypass                                        | yes |
| 46 | (Aorto)coronary bypass of three coronary arteries; Single internal mammary-coronary artery bypass                                       | no  |
| 47 | (Aorto)coronary bypass of two coronary arteries; Single internal mammary-coronary artery bypass                                         | no  |
| 48 | (Aorto)coronary bypass of two coronary arteries; Single internal mammary-coronary artery bypass                                         | no  |
| 49 | (Aorto)coronary bypass of two coronary arteries; Single internal mammary-coronary artery bypass                                         | yes |

**Abdominal / Gastrointestinal (n=63)**

|    |                                                                                                                |     |
|----|----------------------------------------------------------------------------------------------------------------|-----|
| 50 | Open and other right hemicolectomy                                                                             | yes |
| 51 | Open Cholecystectomy; Exploration of common duct                                                               | no  |
| 52 | Laparoscopic cholecystectomy                                                                                   | no  |
| 53 | Open appendectomy                                                                                              | no  |
| 54 | Laparoscopic cholecystectomy                                                                                   | no  |
| 55 | Other and open repair of direct inguinal hernia with graft or prosthesis                                       | no  |
| 56 | Total Intra-Abdominal Colectomy                                                                                | no  |
| 57 | Open and other right hemicolectomy                                                                             | no  |
| 58 | Partial gastrectomy with anastomosis to jejunum                                                                | yes |
| 59 | Other appendectomy                                                                                             | no  |
| 60 | Partial hepatectomy; Laparoscopic cholecystectomy; Endovascular implantation of other graft in abdominal aorta | yes |
| 61 | Laparoscopic paraesophageal hernia repair & gastropexy                                                         | no  |
| 62 | Laparoscopic cholecystectomy and intraoperative cholangiogram                                                  | no  |
| 63 | Other appendectomy                                                                                             | no  |
| 64 | Right femoral hernia repair                                                                                    | no  |

|     |                                                                                                          |     |
|-----|----------------------------------------------------------------------------------------------------------|-----|
| 65  | Laparoscopic cholecystectomy                                                                             | no  |
| 66  | Open and other right hemicolectomy                                                                       | yes |
| 67  | Open and other right hemicolectomy; Other small-to-large intestinal anastomosis                          | yes |
| 68  | Anterior resection of rectum with synchronous colostomy; Other and open repair of direct inguinal hernia | yes |
| 69  | Other anterior resection of rectum; Other removal of both ovaries and tubes at same operative episode    | yes |
| 70  | Open and other left hemicolectomy                                                                        | no  |
| 71  | Partial gastrectomy with anastomosis to jejunum                                                          | no  |
| 72  | Repair of inguinal hernia with graft or prosthesis, not otherwise specified                              | yes |
| 73  | Laparoscopic appendectomy                                                                                | no  |
| 74  | Open and other right hemicolectomy                                                                       | yes |
| 75  | Other and open repair of direct inguinal hernia with graft or prosthesis                                 | yes |
| 76  | Open cholecystectomy                                                                                     | no  |
| 77  | Open and other right hemicolectomy                                                                       | no  |
| 78  | Laparoscopic cholecystectomy                                                                             | no  |
| 79  | Other open incisional hernia repair with graft or prosthesis                                             | no  |
| 80  | Open Cholecystectomy                                                                                     | no  |
| 81  | Laparoscopic cholecystectomy                                                                             | no  |
| 82  | Open and other sigmoidectomy                                                                             | no  |
| 83  | Laparoscopic cholecystectomy; Laparoscopic lysis of peritoneal adhesions                                 | no  |
| 84  | Laparoscopic cholecystectomy                                                                             | no  |
| 85  | Laparoscopic cholecystectomy                                                                             | no  |
| 86  | Open and other right hemicolectomy                                                                       | yes |
| 87  | Laparoscopic enterectomy                                                                                 | no  |
| 88  | Other and open repair of indirect inguinal hernia with graft or prosthesis                               | yes |
| 89  | Other and open repair of indirect inguinal hernia with graft or prosthesis                               | no  |
| 90  | Other and open repair of bilateral direct inguinal hernia with graft or prosthesis                       | yes |
| 91  | Laparoscopic cholecystectomy                                                                             | no  |
| 92  | Laparoscopic appendectomy                                                                                | no  |
| 93  | Laparoscopic cholecystectomy                                                                             | no  |
| 94  | Laparoscopic cholecystectomy                                                                             | yes |
| 95  | Laparoscopic cholecystectomy                                                                             | yes |
| 96  | Open parastomal hernia repair with large bowel resection                                                 | yes |
| 97  | Laparoscopic cholecystectomy                                                                             | yes |
| 98  | Open paraesophageal hernia repair & gastropexy                                                           | no  |
| 99  | Open cecectomy                                                                                           | yes |
| 100 | Open transverse colon resection                                                                          | yes |
| 101 | Other anterior resection of rectum; Other removal of both ovaries and tubes at same operative episode    | yes |
| 102 | Enterectomy, resection of small intestine, with anastomosis                                              | yes |
| 103 | Open cholecystectomy                                                                                     | no  |
| 104 | Laparoscopic cholecystectomy                                                                             | yes |
| 105 | Laparoscopic cholecystectomy                                                                             | yes |

|                                |                                                                                                                           |     |
|--------------------------------|---------------------------------------------------------------------------------------------------------------------------|-----|
| 106                            | Laparoscopic cholecystectomy                                                                                              | yes |
| 107                            | Laparoscopic cholecystectomy                                                                                              | yes |
| 108                            | Other open incisional hernia repair; Creation Of Cutaneoperitoneal Fistula                                                | yes |
| 109                            | Other open incisional hernia repair with graft or prosthesis                                                              | no  |
| 110                            | Exploratory laparotomy; Other lysis of peritoneal adhesions                                                               | no  |
| 111                            | Exploratory laparotomy; Other lysis of peritoneal adhesions                                                               | no  |
| 112                            | Creation Of Cutaneoperitoneal Fistula                                                                                     | no  |
| <b>Musculoskeletal (n=156)</b> |                                                                                                                           |     |
| 113                            | Rotator cuff repair; Other repair of shoulder; Excision of lesion of other soft tissue; Other excision of joint, shoulder | yes |
| 114                            | Other total shoulder replacement; Other plastic operations on tendon                                                      | yes |
| 115                            | Total knee replacement                                                                                                    | yes |
| 116                            | Partial hip replacement; Open reduction of fracture with internal fixation, femur                                         | no  |
| 117                            | Arthrodesis of knee                                                                                                       | yes |
| 118                            | Partial hip replacement; Open reduction of fracture with internal fixation, femur                                         | no  |
| 119                            | Open reduction of fracture with internal fixation, femur                                                                  | no  |
| 120                            | Open reduction of fracture with internal fixation, femur                                                                  | no  |
| 121                            | Total knee replacement                                                                                                    | yes |
| 122                            | Open reduction of fracture with internal fixation, femur                                                                  | no  |
| 123                            | Partial hip replacement                                                                                                   | yes |
| 124                            | Closed reduction of fracture with internal fixation, femur                                                                | no  |
| 125                            | Total knee replacement; Total knee replacement (bilateral)                                                                | yes |
| 126                            | Revision of hip replacement, both acetabular and femoral components                                                       | yes |
| 127                            | Other total shoulder replacement                                                                                          | yes |
| 128                            | Open reduction of fracture with internal fixation, unspecified site; Removal of implanted devices from bone, other bones  | yes |
| 129                            | Total knee replacement; Total knee replacement (bilateral)                                                                | yes |
| 130                            | Total hip replacement                                                                                                     | yes |
| 131                            | Partial hip replacement; Open reduction of fracture with internal fixation, femur                                         | no  |
| 132                            | Open reduction of fracture with internal fixation, femur                                                                  | no  |
| 133                            | Open reduction of fracture with internal fixation, femur; Debridement of open fracture site, femur                        | no  |
| 134                            | Total hip replacement                                                                                                     | yes |
| 135                            | Total knee replacement; Total knee replacement (bilateral)                                                                | yes |
| 136                            | Total knee replacement                                                                                                    | yes |
| 137                            | Total knee replacement                                                                                                    | yes |
| 138                            | Open reduction of fracture with internal fixation, femur                                                                  | no  |
| 139                            | Total knee replacement                                                                                                    | yes |
| 140                            | Revision of knee replacement, not otherwise specified                                                                     | yes |
| 141                            | Open reduction of fracture with internal fixation, tibia and fibula                                                       | no  |
| 142                            | Partial hip replacement; Open reduction of fracture with internal fixation, femur                                         | no  |
| 143                            | Total knee replacement; Total knee replacement (bilateral)                                                                | yes |
| 144                            | Total knee replacement; Total knee replacement (bilateral)                                                                | yes |
| 145                            | Total knee replacement                                                                                                    | yes |

|     |                                                                                                                                                                        |     |
|-----|------------------------------------------------------------------------------------------------------------------------------------------------------------------------|-----|
| 146 | Arthrotomy for removal of prosthesis without replacement, hip; Other local excision or destruction of lesion of joint, hip                                             | yes |
| 147 | Total hip replacement                                                                                                                                                  | no  |
| 148 | Total hip replacement; Hip bearing surface, metal-on-polyethylene                                                                                                      | no  |
| 149 | Total hip replacement                                                                                                                                                  | yes |
| 150 | Partial hip replacement                                                                                                                                                | no  |
| 151 | Open reduction of fracture with internal fixation, femur                                                                                                               | no  |
| 152 | Total knee replacement                                                                                                                                                 | yes |
| 153 | Partial shoulder replacement                                                                                                                                           | yes |
| 154 | Total knee replacement; Revision of knee replacement, tibial component                                                                                                 | yes |
| 155 | Total hip replacement; Hip bearing surface, metal-on-polyethylene                                                                                                      | yes |
| 156 | Revision of hip replacement, not otherwise specified                                                                                                                   | yes |
| 157 | Total hip replacement                                                                                                                                                  | yes |
| 158 | Total knee replacement; Total knee replacement (bilateral)                                                                                                             | yes |
| 159 | Open reduction of fracture with internal fixation, femur                                                                                                               | no  |
| 160 | Total knee replacement; Total knee replacement (bilateral)                                                                                                             | yes |
| 161 | Total knee replacement; Total knee replacement (bilateral)                                                                                                             | yes |
| 162 | Total hip replacement; Hip bearing surface, metal-on-polyethylene                                                                                                      | yes |
| 163 | Open reduction of fracture with internal fixation, tibia and fibula                                                                                                    | no  |
| 164 | Total knee replacement                                                                                                                                                 | yes |
| 165 | Rotator cuff repair; Other repair of shoulder; Other plastic operations on tendon                                                                                      | yes |
| 166 | Rotator cuff repair; Other repair of shoulder; Excision of lesion of other soft tissue; Other excision of joint, shoulder                                              | yes |
| 167 | Open reduction of fracture with internal fixation, femur                                                                                                               | no  |
| 168 | Total knee replacement; Total knee replacement (bilateral)                                                                                                             | yes |
| 169 | Open reduction of fracture with internal fixation, tibia and fibula; Fasciotomy; Suture of artery; Suture of vein; Excisional debridement of wound, infection, or burn | no  |
| 170 | Total knee replacement                                                                                                                                                 | yes |
| 171 | Total knee replacement; Total knee replacement (bilateral)                                                                                                             | yes |
| 172 | Revision of knee replacement, not otherwise specified                                                                                                                  | yes |
| 173 | Total knee replacement; Total knee replacement (bilateral)                                                                                                             | yes |
| 174 | Total hip replacement                                                                                                                                                  | yes |
| 175 | Partial hip replacement                                                                                                                                                | no  |
| 176 | Closed reduction of fracture with internal fixation, femur                                                                                                             | no  |
| 177 | Partial hip replacement; Open reduction of fracture with internal fixation, femur                                                                                      | no  |
| 178 | Total knee replacement; Total knee replacement (bilateral)                                                                                                             | yes |
| 179 | Revision of knee replacement, total (all components)                                                                                                                   | no  |
| 180 | Total knee replacement                                                                                                                                                 | yes |
| 181 | Total knee replacement                                                                                                                                                 | yes |
| 182 | Closed reduction of fracture with internal fixation, femur                                                                                                             | no  |
| 183 | Open reduction of fracture with internal fixation, tibia and fibula; Other repair of ankle                                                                             | no  |
| 184 | Revision of knee replacement, not otherwise specified                                                                                                                  | yes |
| 185 | Partial hip replacement                                                                                                                                                | no  |
| 186 | Open reduction of fracture with internal fixation, radius and ulna                                                                                                     | no  |

|     |                                                                                                                                      |     |
|-----|--------------------------------------------------------------------------------------------------------------------------------------|-----|
| 187 | Total knee replacement; Total knee replacement (bilateral)                                                                           | yes |
| 188 | Open reduction of fracture with internal fixation, femur                                                                             | no  |
| 189 | Open reduction of fracture with internal fixation, femur                                                                             | no  |
| 190 | Open reduction of fracture with internal fixation, tibia and fibula                                                                  | no  |
| 191 | Total hip replacement                                                                                                                | yes |
| 192 | Closed reduction of fracture with internal fixation, femur                                                                           | no  |
| 193 | Local excision of lesion or tissue of bone, other bones; Interphalangeal fusion; Excisional debridement of wound, infection, or burn | no  |
| 194 | Partial hip replacement                                                                                                              | no  |
| 195 | Partial hip replacement                                                                                                              | no  |
| 196 | Other repair of shoulder                                                                                                             | yes |
| 197 | Total hip replacement                                                                                                                | yes |
| 198 | Closed reduction of fracture with internal fixation, femur                                                                           | no  |
| 199 | Partial hip replacement; Closed reduction of fracture with internal fixation, radius and ulna                                        | no  |
| 200 | Open reduction of fracture with internal fixation, femur; Revision of hip replacement, not otherwise specified                       | no  |
| 201 | Open reduction of fracture with internal fixation, femur                                                                             | no  |
| 202 | Partial hip replacement                                                                                                              | no  |
| 203 | Partial hip replacement; Open reduction of fracture with internal fixation, femur                                                    | no  |
| 204 | Closed reduction of fracture with internal fixation, radius and ulna                                                                 | no  |
| 205 | Open reduction of fracture with internal fixation, femur                                                                             | no  |
| 206 | Closed reduction of fracture with internal fixation, femur                                                                           | no  |
| 207 | Revision of hip replacement, not otherwise specified                                                                                 | no  |
| 208 | Open reduction of fracture with internal fixation, femur                                                                             | no  |
| 209 | Partial hip replacement                                                                                                              | no  |
| 210 | Partial hip replacement                                                                                                              | no  |
| 211 | Partial hip replacement; Open reduction of fracture with internal fixation, femur                                                    | no  |
| 212 | Open reduction of fracture with internal fixation, femur                                                                             | no  |
| 213 | Total knee replacement                                                                                                               | yes |
| 214 | Total hip replacement                                                                                                                | yes |
| 215 | Open reduction of fracture with internal fixation, femur                                                                             | no  |
| 216 | Open reduction of fracture with internal fixation, femur                                                                             | no  |
| 217 | Total hip replacement                                                                                                                | yes |
| 218 | Open reduction of fracture with internal fixation, femur                                                                             | no  |
| 219 | Revision of hip replacement, not otherwise specified                                                                                 | yes |
| 220 | Open reduction of fracture with internal fixation, femur                                                                             | no  |
| 221 | Other repair or plastic operations on bone, other bones                                                                              | no  |
| 222 | Open reduction of fracture with internal fixation, tibia and fibula                                                                  | no  |
| 223 | Total knee replacement; Revision of knee replacement, not otherwise specified                                                        | yes |
| 224 | Closed reduction of fracture with internal fixation, femur                                                                           | no  |
| 225 | Revision of hip replacement, not otherwise specified                                                                                 | yes |
| 226 | Partial hip replacement                                                                                                              | no  |
| 227 | Total hip replacement                                                                                                                | yes |
| 228 | Open reduction of fracture with internal fixation, femur                                                                             | no  |

|     |                                                                                                                                                                                                      |     |
|-----|------------------------------------------------------------------------------------------------------------------------------------------------------------------------------------------------------|-----|
| 229 | Rotator cuff repair; Other repair of shoulder; Excision of lesion of other soft tissue; Other excision of joint, shoulder                                                                            | yes |
| 230 | Total hip replacement                                                                                                                                                                                | yes |
| 231 | Total hip replacement                                                                                                                                                                                | yes |
| 232 | Total knee replacement                                                                                                                                                                               | yes |
| 233 | Total hip replacement                                                                                                                                                                                | no  |
| 234 | Partial hip replacement; Open reduction of fracture with internal fixation, femur                                                                                                                    | no  |
| 235 | Open reduction of fracture with internal fixation, unspecified site; Removal of implanted devices from bone, other bones                                                                             | yes |
| 236 | Revision of hip replacement, not otherwise specified                                                                                                                                                 | yes |
| 237 | Total knee replacement                                                                                                                                                                               | yes |
| 238 | Total knee replacement                                                                                                                                                                               | yes |
| 239 | Revision of knee replacement, not otherwise specified                                                                                                                                                | yes |
| 240 | Open reduction of fracture with internal fixation, tibia and fibula                                                                                                                                  | no  |
| 241 | Total hip replacement                                                                                                                                                                                | no  |
| 242 | Total hip replacement                                                                                                                                                                                | no  |
| 243 | Total knee replacement                                                                                                                                                                               | yes |
| 244 | Total knee replacement; Total knee replacement (bilateral)                                                                                                                                           | yes |
| 245 | Other repair or plastic operations on bone, other bones                                                                                                                                              | no  |
| 246 | Open reduction of fracture with internal fixation, Olecranon Fracture                                                                                                                                | no  |
| 247 | Other repair or plastic operations on bone, other bones                                                                                                                                              | yes |
| 248 | Other repair or plastic operations on bone, other bones                                                                                                                                              | yes |
| 249 | Closed reduction of fracture with internal fixation, femur                                                                                                                                           | no  |
| 250 | Closed reduction of fracture with internal fixation, tibia and fibula                                                                                                                                | no  |
| 251 | Open reduction of fracture with internal fixation, femur                                                                                                                                             | no  |
| 252 | Open reduction of fracture with internal fixation, femur                                                                                                                                             | no  |
| 253 | Open reduction of fracture with internal fixation, femur                                                                                                                                             | no  |
| 254 | Open reduction of fracture with internal fixation, femur                                                                                                                                             | no  |
| 255 | Open reduction of fracture with internal fixation, femur                                                                                                                                             | no  |
| 256 | Open reduction of fracture with internal fixation, femur                                                                                                                                             | no  |
| 257 | Open reduction of fracture with internal fixation, femur                                                                                                                                             | no  |
| 258 | Open reduction of fracture with internal fixation, femur                                                                                                                                             | no  |
| 259 | Total hip replacement                                                                                                                                                                                | yes |
| 260 | Partial hip replacement; Open reduction of fracture with internal fixation, femur                                                                                                                    | no  |
| 261 | Partial hip replacement                                                                                                                                                                              | no  |
| 262 | Partial hip replacement                                                                                                                                                                              | no  |
| 263 | Revision of hip replacement, not otherwise specified                                                                                                                                                 | yes |
| 264 | Total knee replacement                                                                                                                                                                               | yes |
| 265 | Total knee replacement                                                                                                                                                                               | yes |
| 266 | Excision of lesion of other soft tissue; Other excision of joint                                                                                                                                     | yes |
| 267 | Excisional debridement of wound, infection, or burn; Total ostectomy, tarsals and metatarsals; Excisional debridement of wound, infection, or burn; Other partial ostectomy, tarsals and metatarsals | yes |
| 268 | Excisional debridement of wound, infection, or burn; Other partial ostectomy, tarsals and metatarsals                                                                                                | no  |

**Vascular (n=66)**

|     |                                                                                                                 |     |
|-----|-----------------------------------------------------------------------------------------------------------------|-----|
| 269 | Open lysis of adhesions; Intra-abdominal vascular shunt; Resection of vessel with replacement, aorta, abdominal | yes |
| 270 | Resection of vessel with replacement, aorta, abdominal                                                          | yes |
| 271 | Aorta-iliac-femoral bypass; revision of distal anastomosis                                                      | yes |
| 272 | Other (peripheral) vascular shunt or bypass; Other revision of vascular procedure                               | yes |
| 273 | Angioplasty of other non-coronary vessel(s)                                                                     | yes |
| 274 | Endarterectomy, lower limb arteries                                                                             | yes |
| 275 | Endarterectomy, lower limb arteries; left lower limb angioplasty                                                | yes |
| 276 | Other (peripheral) vascular shunt or bypass                                                                     | no  |
| 277 | Other (peripheral) vascular shunt or bypass                                                                     | no  |
| 278 | Superficial artery to posterior tibial bypass with greater saphenous vein graft                                 | yes |
| 279 | Endarterectomy, other vessels of head and neck                                                                  | yes |
| 280 | Angioplasty of other non-coronary vessel(s) with stent placement                                                | yes |
| 281 | Other revision of vascular procedure; Other endovascular procedures on other vessels                            | no  |
| 282 | Endarterectomy, other vessels of head and neck                                                                  | yes |
| 283 | Endarterectomy, lower limb arteries; right lower limb angioplasty                                               | no  |
| 284 | Endarterectomy, other vessels of head and neck                                                                  | yes |
| 285 | Other amputation below knee                                                                                     | no  |
| 286 | Other revision of vascular procedure                                                                            | yes |
| 287 | Other revision of vascular procedure                                                                            | yes |
| 288 | Endarterectomy, other vessels of head and neck                                                                  | yes |
| 289 | Angioplasty of other non-coronary vessel(s)                                                                     | yes |
| 290 | Left femoral to anterior tibial bypass graft                                                                    | yes |
| 291 | Resection of vessel with replacement, lower limb arteries                                                       | yes |
| 292 | Endovascular implantation of other graft in abdominal aorta                                                     | yes |
| 293 | Endarterectomy, other vessels of head and neck                                                                  | yes |
| 294 | Angioplasty of other non-coronary vessel(s)                                                                     | yes |
| 295 | Arteriovenostomy for renal dialysis                                                                             | yes |
| 296 | Left carotid endarterectomy                                                                                     | no  |
| 297 | Resection of vessel with replacement, aorta, abdominal; Open cholecystectomy                                    | yes |
| 298 | Aorta-iliac-femoral bypass                                                                                      | no  |
| 299 | Angioplasty of other non-coronary vessel(s)                                                                     | yes |
| 300 | Endarterectomy, lower limb arteries; right lower limb angioplasty                                               | yes |
| 301 | Endarterectomy, other vessels of head and neck                                                                  | yes |
| 302 | Other (peripheral) vascular shunt or bypass; Other revision of vascular procedure                               | yes |
| 303 | Other (peripheral) vascular shunt or bypass; Other revision of vascular procedure                               | yes |
| 304 | Angioplasty of other non-coronary vessel(s) with stent placement                                                | yes |
| 305 | Endarterectomy, other vessels of head and neck                                                                  | yes |
| 306 | Endarterectomy, other vessels of head and neck                                                                  | yes |
| 307 | Resection of vessel with replacement, aorta, abdominal                                                          | yes |
| 308 | Angioplasty of other non-coronary vessel(s) with stent placement                                                | yes |
| 309 | Endarterectomy, other vessels of head and neck                                                                  | yes |
| 310 | Endarterectomy, other vessels of head and neck                                                                  | yes |



|                     |                                                                                                                                                                                                                                                                                   |     |
|---------------------|-----------------------------------------------------------------------------------------------------------------------------------------------------------------------------------------------------------------------------------------------------------------------------------|-----|
| 311                 | Endarterectomy, other vessels of head and neck                                                                                                                                                                                                                                    | yes |
| 312                 | Angioplasty of other non-coronary vessel(s) with stent placement                                                                                                                                                                                                                  | no  |
| 313                 | Other (peripheral) vascular shunt or bypass                                                                                                                                                                                                                                       | yes |
| 314                 | Endarterectomy, bilateral renal arteries                                                                                                                                                                                                                                          | yes |
| 315                 | Endarterectomy, other vessels of head and neck                                                                                                                                                                                                                                    | yes |
| 316                 | Incision of vessel, lower limb arteries; Thrombectomy of occlusive thrombus                                                                                                                                                                                                       | no  |
| 317                 | Endarterectomy, other vessels of head and neck                                                                                                                                                                                                                                    | yes |
| 318                 | Endarterectomy, other vessels of head and neck                                                                                                                                                                                                                                    | yes |
| 319                 | Endarterectomy, other vessels of head and neck                                                                                                                                                                                                                                    | no  |
| 320                 | Endarterectomy, other vessels of head and neck                                                                                                                                                                                                                                    | yes |
| 321                 | Endarterectomy, other vessels of head and neck                                                                                                                                                                                                                                    | yes |
| 322                 | Endarterectomy, lower limb arteries                                                                                                                                                                                                                                               | yes |
| 323                 | Resection of vessel with replacement, aorta, abdominal                                                                                                                                                                                                                            | no  |
| 324                 | Aorta-iliac-femoral bypass                                                                                                                                                                                                                                                        | yes |
| 325                 | Arteriovenostomy For Renal Dialysis                                                                                                                                                                                                                                               | no  |
| 326                 | Other (peripheral) vascular shunt or bypass                                                                                                                                                                                                                                       | yes |
| 327                 | Other (peripheral) vascular shunt or bypass                                                                                                                                                                                                                                       | no  |
| 328                 | Other (peripheral) vascular shunt or bypass; Other revision of vascular procedure                                                                                                                                                                                                 | yes |
| 329                 | Other (peripheral) vascular shunt or bypass; Other revision of vascular procedure                                                                                                                                                                                                 | yes |
| 330                 | Angioplasty of other non-coronary vessel(s) with stent placement                                                                                                                                                                                                                  | yes |
| 331                 | Angioplasty of other non-coronary vessel(s) with stent placement                                                                                                                                                                                                                  | no  |
| 332                 | Repair of arteriovenous fistula; Excisional debridement of wound, infection, or burn; Excisional debridement of wound, infection, or burn;                                                                                                                                        | no  |
| 333                 | Insertion Of Vessel-To-Vessel Cannula                                                                                                                                                                                                                                             | no  |
| 334                 | Other amputation below knee                                                                                                                                                                                                                                                       | no  |
| <b>Other (n=60)</b> |                                                                                                                                                                                                                                                                                   |     |
| 335                 | Total Abdominal Hysterectomy; Other removal of both ovaries and tubes at same operative episode; Regional lymph node excision                                                                                                                                                     | yes |
| 336                 | Local excision of lesion of breast; Excision of axillary lymph node                                                                                                                                                                                                               | yes |
| 337                 | Other removal of both ovaries and tubes at same operative episode                                                                                                                                                                                                                 | yes |
| 338                 | Total Abdominal Hysterectomy; Other removal of both ovaries and tubes at same operative episode; Other partial resection of small intestine; Small-to-small intestinal anastomosis; Excision of lesion or tissue of large intestine; Excision or destruction of peritoneal tissue | yes |
| 339                 | Total vaginal hysterectomy; Repair of cystocele                                                                                                                                                                                                                                   | yes |
| 340                 | Other transurethral prostatectomy                                                                                                                                                                                                                                                 | yes |
| 341                 | Unilateral simple mastectomy; Excision of axillary lymph node; Unilateral simple mastectomy; Excision of axillary lymph node                                                                                                                                                      | no  |
| 342                 | Anterior colporrhaphy, cystocele repair, posterior colporrhaphy, rectocele repair                                                                                                                                                                                                 | yes |
| 343                 | Other transurethral excision or destruction of lesion or tissue of bladder                                                                                                                                                                                                        | yes |
| 344                 | Excisional debridement of wound, infection, or burn; Excisional debridement of wound, infection, or burn                                                                                                                                                                          | yes |
| 345                 | Radical vulvectomy; Regional lymph node excision                                                                                                                                                                                                                                  | yes |
| 346                 | Other transurethral excision or destruction of lesion or tissue of bladder                                                                                                                                                                                                        | yes |
| 347                 | Total Abdominal Hysterectomy; Other removal of both ovaries and tubes at same operative episode; Other lysis of peritoneal adhesions; Regional lymph node excision                                                                                                                | yes |

|     |                                                                                                                                                                                                                  |     |
|-----|------------------------------------------------------------------------------------------------------------------------------------------------------------------------------------------------------------------|-----|
| 348 | Unilateral simple mastectomy; Excision of axillary lymph node                                                                                                                                                    | yes |
| 349 | Other transurethral excision or destruction of lesion or tissue of bladder                                                                                                                                       | yes |
| 350 | Other transurethral prostatectomy                                                                                                                                                                                | yes |
| 351 | Perineal prostatectomy                                                                                                                                                                                           | yes |
| 352 | Other transurethral prostatectomy                                                                                                                                                                                | yes |
| 353 | Partial ureterectomy; Other transurethral excision or destruction of lesion or tissue of bladder                                                                                                                 | no  |
| 354 | Total Abdominal Hysterectomy; Other removal of both ovaries and tubes at same operative episode; Regional lymph node excision; Excision or destruction of peritoneal tissue; Other lysis of peritoneal adhesions | yes |
| 355 | Total Abdominal Hysterectomy; Other removal of both ovaries and tubes at same operative episode                                                                                                                  | yes |
| 356 | Other repair of urinary stress incontinence                                                                                                                                                                      | yes |
| 357 | Transurethral removal of obstruction from ureter and renal pelvis                                                                                                                                                | no  |
| 358 | Implantation of artificial urinary sphincter                                                                                                                                                                     | yes |
| 359 | Total Abdominal Hysterectomy; Other removal of both ovaries and tubes at same operative episode                                                                                                                  | yes |
| 360 | Total Abdominal Hysterectomy; Other removal of both ovaries and tubes at same operative episode; Excision or destruction of peritoneal tissue; Regional lymph node excision                                      | yes |
| 361 | Other transurethral excision or destruction of lesion or tissue of bladder                                                                                                                                       | no  |
| 362 | Other partial thyroidectomy                                                                                                                                                                                      | no  |
| 363 | Other removal of remaining ovary and tube; Other lysis of adhesions                                                                                                                                              | yes |
| 364 | Radical excision of skin lesion; Pedicle or flap graft, not otherwise specified; Other skin graft to other sites                                                                                                 | yes |
| 365 | Other transurethral excision or destruction of lesion or tissue of bladder                                                                                                                                       | yes |
| 366 | Radical excision of skin lesion; Other skin graft to other sites                                                                                                                                                 | yes |
| 367 | Other transurethral prostatectomy                                                                                                                                                                                | yes |
| 368 | Other transurethral excision or destruction of lesion or tissue of bladder                                                                                                                                       | yes |
| 369 | Other transurethral excision or destruction of lesion or tissue of bladder                                                                                                                                       | no  |
| 370 | Complete axillary lymph node dissection                                                                                                                                                                          | yes |
| 371 | Other transurethral prostatectomy                                                                                                                                                                                | yes |
| 372 | Total thyroidectomy                                                                                                                                                                                              | yes |
| 373 | Nephroureterectomy; Regional lymph node excision                                                                                                                                                                 | yes |
| 374 | Other parathyroidectomy                                                                                                                                                                                          | yes |
| 375 | Other septoplasty                                                                                                                                                                                                | yes |
| 376 | Unilateral total mastectomy                                                                                                                                                                                      | yes |
| 377 | Other transurethral prostatectomy                                                                                                                                                                                | yes |
| 378 | Other transurethral excision or destruction of lesion or tissue of bladder                                                                                                                                       | yes |
| 379 | Other transurethral prostatectomy                                                                                                                                                                                | yes |
| 380 | Other transurethral prostatectomy                                                                                                                                                                                | yes |
| 381 | Other transurethral prostatectomy                                                                                                                                                                                | yes |
| 382 | Total Abdominal Hysterectomy; Rectocele repair; Plication of urethrovesical junction; Levator muscle suspension; vaginal reconstruction                                                                          | yes |
| 383 | Other transurethral excision or destruction of lesion or tissue of bladder                                                                                                                                       | yes |
| 384 | Ethmoidectomy; Excision of lesion of maxillary sinus with other approach                                                                                                                                         | yes |
| 385 | Regional Lymph Node Excision                                                                                                                                                                                     | yes |

|     |                                                                   |     |
|-----|-------------------------------------------------------------------|-----|
| 386 | Transurethral removal of obstruction from ureter and renal pelvis | yes |
| 387 | Other transurethral prostatectomy                                 | yes |
| 388 | Other transurethral prostatectomy                                 | yes |
| 389 | Other transurethral prostatectomy                                 | yes |
| 390 | Other dilation and curettage                                      | no  |
| 391 | Revision of amputation stump                                      | no  |
| 392 | Revision of amputation stump                                      | no  |
| 393 | Local excision of lesion of breast                                | yes |
| 394 | Other repair and reconstruction of skin and subcutaneous tissue   | no  |

<sup>a</sup> We classified operations into one of six major operation types: neurologic, including neurological surgery, spine surgery, and nervous system operations; cardiothoracic, including cardiac surgery and thoracic surgery; abdominal, including abdominal, gastrointestinal, and digestive system surgery; musculoskeletal, including musculoskeletal and orthopedic surgery; vascular; and other, which included: gynecological, obstetrical, and female genital organ surgery; genitourinary, urologic, and male genital organ surgery; endocrine system operations; breast surgery; soft tissue, skin/integumentary surgery; organ transplantation; and ear, nose, mouth, and pharynx operations. Please see the Methods section for details on what type of operations were excluded.
